# Supplementary material for: Weakly ordered chiral alignment medium derived from 5′-GMP : guanosine
Source: Royal Society of Chemistry journal article supplement (doi:10.1039/c3cc00045a), 2013-01-01
Supplement: c3cc00045a.pdf [file c3cc00045a.pdf]

# Supporting information

## Weakly Ordered Chiral Alignment Medium Derived from 5'-GMP: Guanosine

Lokesh and N. Suryaprakash\*

NMR Research Centre, Solid State and Structural Chemistry Unit, Indian Institute  
of Science, Bangalore-560012, India.

Fax: +91 80 23601550;

Tel: +91 80 22933300;

E-mail: [nsp@sif.iisc.ernet.in](mailto:nsp@sif.iisc.ernet.in)

## Index

1. The structure of guanosine and 5'-GMP
2. Sample preparation and experimental details
3. Table S1: The variation of  $\Delta\nu_Q$  as a function of the molar ratio of 5'-GMP and guanosine
4. Complete  $F_2$  coupled  $^{13}\text{C}$ - $^1\text{H}$  HSQC spectra of L-proline and the tripeptide in mesophase.
5. Table S2: The RDCs calculated from  $F_2$  coupled  $^{13}\text{C}$ - $^1\text{H}$  HSQC spectrum of L-proline
6. 2D proton SERF NMR spectra of alanine and aspartic acid
7. Table S3: The comparison of experimental parameters of different mesophases
8. Table S4. Experimentally measured quadrupolar splittings and corresponding line width of  $\text{D}_2\text{O}$  solvent at 298K

1. The structures of Guanosine and 5'-GMP

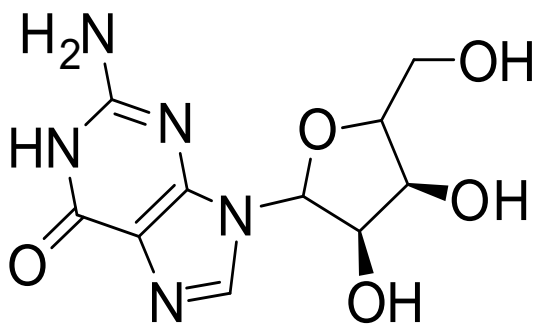

**Guanosine**

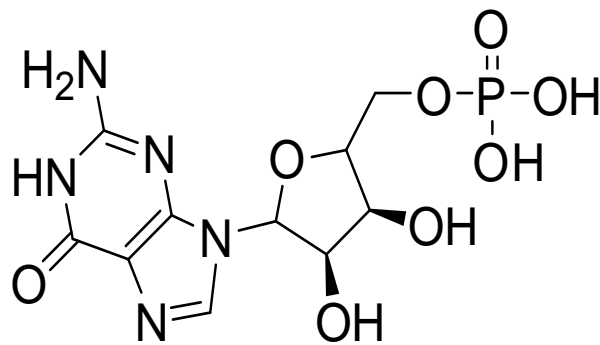

**5'-GMP**

2. Sample preparation and experimental details

All the chemicals were purchased from Sigma-Aldrich, used directly without further purification.

### **For RDC Measurement**

5'-GMPNa<sub>2</sub> and guanosine were taken in of D<sub>2</sub>O (0.1 molar NaCl solution). The mixture was heated to 343-353 K for 5 to 10 minutes till it becomes a clear solution, and then cooled to room temperature. After nearly an hour the deuterium spectrum was recorded for homogenized sample to confirm the anisotropic phase (quadrupole doublet splitting of solvent D<sub>2</sub>O). sample (tripeptide or L-proline) was added to the mesophase in an NMR tube, centrifuged back and forth, slightly warmed to solublize the solute molecules.

#### **A). Tripeptide sample**

26 mg of 5'-GMPNa<sub>2</sub> and 13.5 mg of guanosine were taken in 0.5 ml of D<sub>2</sub>O + 6 mg of tripeptide (Gly-Glu-Cys)

#### **B). L-Proline sample**

26.5 mg of 5'-GMPNa<sub>2</sub> and 13 mg of guanosine were taken in 0.5 ml of D<sub>2</sub>O + 5 mg of L-proline

### **For Enantiomeric (Enantiotopic) Discrimination**

5'-GMPNa<sub>2</sub> and guanosine were taken in H<sub>2</sub>O (0.1 molar NaCl solution). The mixture was heated to 343-353 K for 5 to 10 minutes till it becomes a clear solution, cooled to room temperature and allowed for an 1hr. sample (alanine) was added to the mesophase in an NMR tube, centrifuged back and forth, slightly warmed to solublize the solute molecules

Composition

#### **A). For DL-alanine-d<sub>3</sub> sample**

64.2 mg of 5'-GMPNa<sub>2</sub> and 36 mg of guanosine in 0.5 ml of H<sub>2</sub>O + 8 mg of DL-alanine-d<sub>3</sub>

#### **B). Scalemic mixture with excess of L-alanine-d<sub>3</sub>**

64.2mg of 5'-GMPNa<sub>2</sub> and 36 mg of guanosine in 0.5 ml of H<sub>2</sub>O + 4mg of D-alanine-d<sub>3</sub> + 5.95 mg of L-alanine-d<sub>3</sub>

#### **C). For glycine-d<sub>3</sub> sample**

65.5 mg of 5'-GMPNa<sub>2</sub> and 36 mg of guanosine in 0.5 ml of H<sub>2</sub>O + 9.5 mg of glycine-d<sub>2</sub>

All NMR experiments were carried out using Bruker DRX-500 NMR spectrometer equipped with a TXI probe and a BVT-3000 temperature controller.

- 3. Table S1:** The variation of  $\Delta\nu_Q$  as a function of the molar ratio of 5'-GMP and guanosine in the solvent D<sub>2</sub>O. The molar ratios were also altered by varying the quantity of guanosine keeping the quantity of 5'-GMP fixed. Notice the enhanced separation with the increased quantity of guanosine.

| Molar ratio<br>[5'-GMP/Guanosine] | 5'-GMPNa <sub>2</sub> ·H <sub>2</sub> O<br>[mg in 1ml] <sup>*</sup> | Guanosine<br>[mg in 1ml] <sup>*</sup> | Quadrupolar<br>splitting [Hz] <sup>*</sup> |
|-----------------------------------|---------------------------------------------------------------------|---------------------------------------|--------------------------------------------|
| 1.16                              | 20±1                                                                | 12±1                                  | 3.5±2                                      |
| 1.39                              | 40±1                                                                | 20±1                                  | 11.2±2                                     |
| 1.113                             | 40±1                                                                | 25±1                                  | 15.0±2                                     |
| 1.739                             | 50±1                                                                | 20±1                                  | 13.9±2                                     |
| 1.242                             | 50±1                                                                | 28±1                                  | 23.8±2                                     |
| 2.434                             | 70±1                                                                | 20±1                                  | 15.0±2                                     |
| 1.6314                            | 70±1                                                                | 30±1                                  | 22.8±2                                     |

**\*The large errors are intentionally reported as there may be slight evaporation of water during heating and the concentration may not be very precise.**

#### 4. The complete F<sub>2</sub>-coupled <sup>13</sup>C-<sup>1</sup>H HSQC spectra of tripeptide and L-proline in 5'-GMP:guanosine mesophase

The complete spectrum contains peaks both from the solute and the aligning medium. Nevertheless they are clearly separated and distinguishable. This demarcation is indicated by a horizontal dotted line. The aliphatic region of the spectrum is completely free from the signals of the liquid crystal background [upto 65 ppm in <sup>13</sup>C spectrum and up to 3.8 ppm in <sup>1</sup>H spectrum].

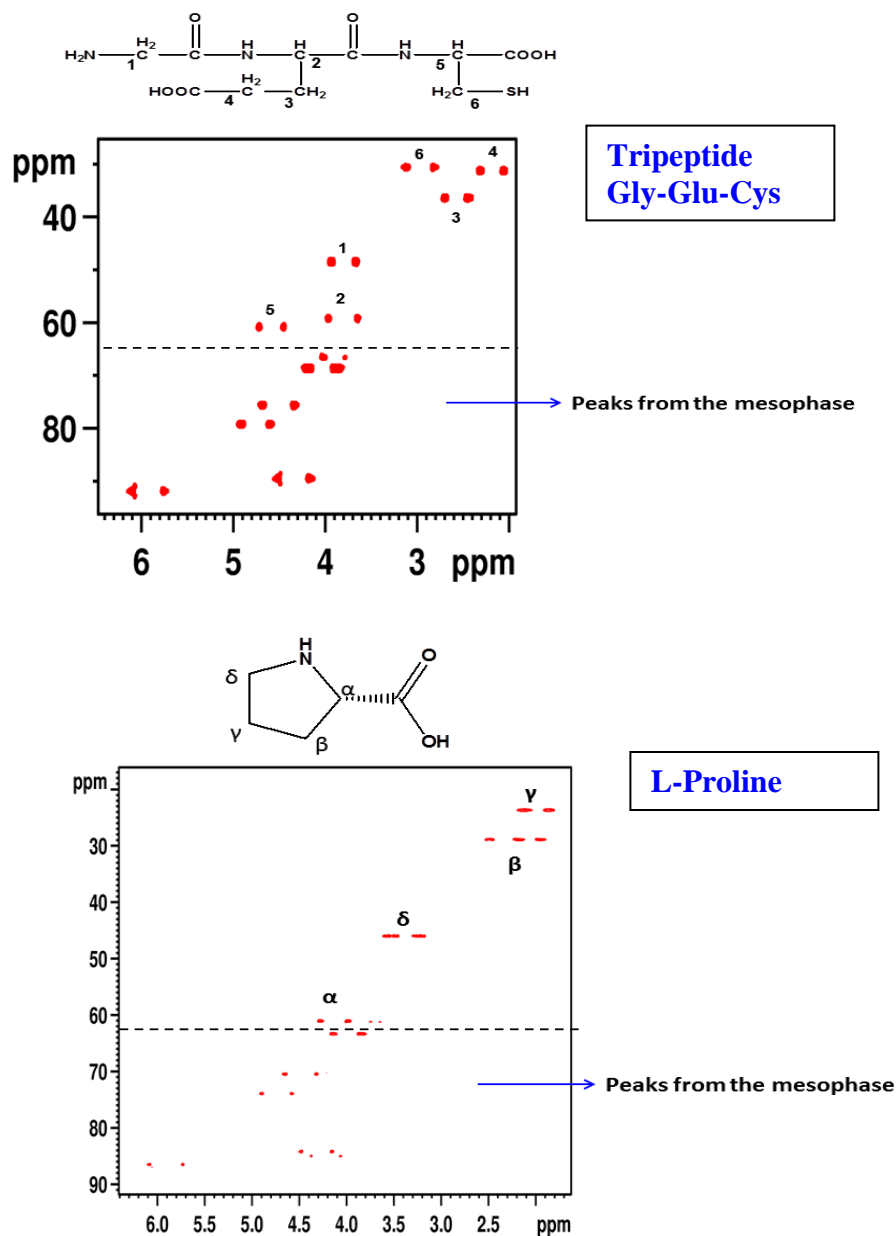

5. **Table S2: The RDCs calculated from F2 coupled  $^{13}\text{C}$ - $^1\text{H}$  HSQC spectrum of L-proline. The large errors are reported for two couplings, because the measurement of frequency separation is likely to be imprecise due to severe overlap of transitions.**

|                                      | $2^1\text{D}_{\text{CH}} + ^2\text{J}_{\text{CH}}$ | $^1\text{J}_{\text{CH}}^*$ | $^1\text{D}_{\text{CH}}$ |
|--------------------------------------|----------------------------------------------------|----------------------------|--------------------------|
| $\text{C}_\alpha\text{-H}_\alpha$    | $145.5 \pm 0.2$                                    | $148.7 \pm 0.4$            | $-1.6 \pm 0.3$           |
| $\text{C}_\beta\text{-H}_\beta$      | $159.3 \pm 4.0$                                    | $141.0 \pm 2.0$            | $9.2 \pm 3.0$            |
| $\text{C}_\beta\text{-H}_{\beta'}$   | $115.2 \pm 4.0$                                    | $136.1 \pm 2.0$            | $-10.1 \pm 3.0$          |
| $\text{C}_\gamma\text{-H}_\gamma$    | $133.2 \pm 0.5$                                    | $135.7 \pm 0.2$            | $-1.3 \pm 0.3$           |
| $\text{C}_\delta\text{-H}_\delta$    | $140.1 \pm 0.3$                                    | $147.3 \pm 0.3$            | $-3.6 \pm 0.3$           |
| $\text{C}_\delta\text{-H}_{\delta'}$ | $149.0 \pm 0.5$                                    | $147.5 \pm 1.0$            | $0.8 \pm 0.7$            |

\*The values were calculated from the isotropic phase in the solvent  $\text{D}_2\text{O}$ .



6. 2D Proton SERF NMR spectra of (D/L)-alanine and (D/L)-aspartic acid with selective excitation of CH<sub>3</sub> and CH<sub>2</sub> groups respectively.

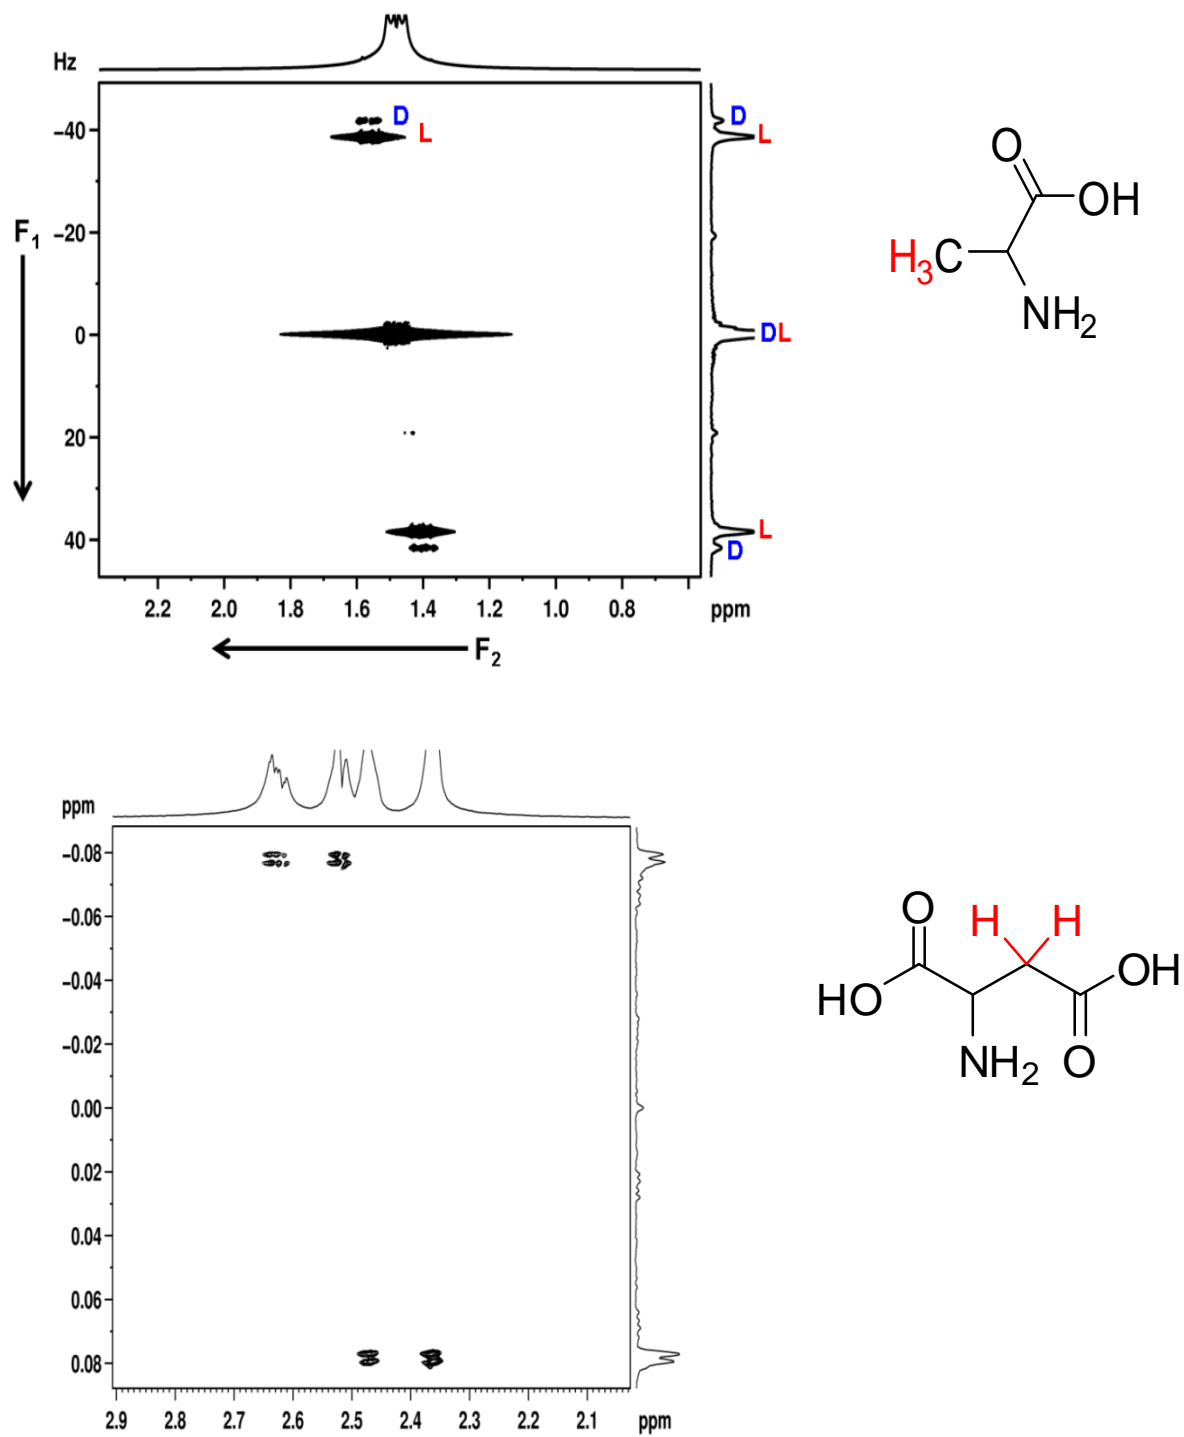

**7. Table S3: The comparison of experimental parameters of different mesophases**

| <b>Aligning media</b>     | <b>Minimum quadrupolar coupling attainable</b> | <b>Applicability</b>                          | <b>Preparation time of the mesophase</b> | <b>Preparation steps</b>                                |
|---------------------------|------------------------------------------------|-----------------------------------------------|------------------------------------------|---------------------------------------------------------|
| 5'-GMP:Guanosine          | < 5Hz                                          | Measurement of RDCs and Enantiodiscrimination | 1 Hr                                     | Mixing solutes and solvent                              |
| Xanthane <sup>1</sup>     | 45Hz                                           | Measurement of RDCs and Enantiodiscrimination | Minimum of one day                       | Sonification, lyophilization, mixing solute and solvent |
| Folic acid <sup>2</sup>   | 70Hz                                           | Enantiodiscrimination                         | Minimum of two days                      | Mixing solute and solvent                               |
| DNA <sup>3</sup>          | 45Hz                                           | Enantiodiscrimination                         | Minimum of one day                       | Sonification, lyophilization, mixing solute and solvent |
| Beta-Peptide <sup>4</sup> | <15Hz                                          | Measurement of RDCs and Enantiodiscrimination | -                                        | Involves multi-step synthesis                           |

1. U. V. Reddy and N. Suryaprakash., *Chem. Commun.*, 2011, **47**, 8364.

2. Lokesh and N. Suryaprakash *Chem. Eur. J.*, 2012, **18**, 11560.

3. (a) S. P. Sau and K. V. Ramanathan., *J. Phys. Chem. B*, 2009, **113**, 1530-1532; (b) P. Lesot, U. V. Reddy and N. Suryaprakash, *Chem. Commun.*, 2011, **47**, 11736.

4. (a). C. M. Thiele, W C. Pomerantz, N. L. Abbott and S. H. Gellman., *Chem. Commun.*, 2011, **47**, 502. (b) W. C. Pomerantz, N. L. Abbott and S. H. Gellman, *J. Am. Chem. Soc.*, 2006, **128**, 8730;

**8. Table S4. Experimentally measured quadrupolar splittings of D<sub>2</sub>O solvent at 298K and the corresponding line width.**

| <b>Quadrupolar splittings [Hz]</b> | <b>Line width [Hz]</b> |
|------------------------------------|------------------------|
| 8.2                                | 1.2                    |
| 17.5                               | 2.2                    |
| 38.1                               | 4.2                    |
| 52.5                               | 7.5                    |
| 75.4                               | 11.1                   |
| 90.5                               | 13.7                   |
| 112.5                              | 16.4                   |
